# Supplementary material
Source: HighWire-hosted journal article supplement (https://erj.ersjournals.com/content/60/1/2102311)

## Refined simplified risk stratification (Risk 2.0) in patients with PAH:

### Results from COMPERA

#### Supplementary material

**Table S1 Characteristics of the patients at follow-up (first assessment  $\geq 12$  weeks after treatment initiation, up to 12 months)**

|                                 | Low risk<br>n=240<br>(17.0%) | Intermediate<br>low risk<br>n=395<br>(27.9%) | Intermediate<br>high risk<br>n=534<br>(37.8%) | High risk<br>n=245<br>(17.3%) | All<br>n=1414<br>(100%) | Available data |
|---------------------------------|------------------------------|----------------------------------------------|-----------------------------------------------|-------------------------------|-------------------------|----------------|
| Age, years                      | 51.1 (15.7)                  | 63.8 (14.4)                                  | 70.1 (12.9)                                   | 75.0 (10.1)                   | 66.0 (15.5)             | 1414 (100.0%)  |
| Female                          | 148 (61.7%)                  | 257 (65.1%)                                  | 361 (67.6%)                                   | 157 (64.1%)                   | 923 (65.3%)             | 1414 (100.0%)  |
| BMI, kg/m <sup>2</sup>          | 26.8 (5.2)                   | 29.1 (7.0)                                   | 28.6 (6.4)                                    | 28.1 (5.7)                    | 28.3 (6.3)              | 1123 (79.4%)   |
| Diagnosis                       |                              |                                              |                                               |                               |                         | 1414 (100.0%)  |
| I/H/D PAH                       | 164 (68.3%)                  | 276 (69.9%)                                  | 391 (73.2%)                                   | 188 (76.7%)                   | 1019 (72.1%)            |                |
| CTD-PAH                         | 44 (18.3%)                   | 73 (18.5%)                                   | 107 (20.0%)                                   | 45 (18.4%)                    | 269 (19.0%)             |                |
| CHD-PAH                         | 5 (2.1%)                     | 18 (4.6%)                                    | 13 (2.4%)                                     | 6 (2.4%)                      | 42 (3.0%)               |                |
| HIV-PAH                         | 3 (1.3%)                     | 4 (1.0%)                                     | 5 (0.9%)                                      | 1 (0.4%)                      | 13 (0.9%)               |                |
| PoPH                            | 24 (10.0%)                   | 24 (6.1%)                                    | 18 (3.4%)                                     | 5 (2.0%)                      | 71 (5.0%)               |                |
| WHO FC                          |                              |                                              |                                               |                               |                         | 1242 (87.8%)   |
| I                               | 23 (10.5%)                   | 10 (2.8%)                                    | 1 (0.2%)                                      | 0 (0.0%)                      | 34 (2.6%)               |                |
| II                              | 196 (89.5%)                  | 172 (48.2%)                                  | 49 (9.7%)                                     | 0 (0.0%)                      | 417 (32.2%)             |                |
| III                             | 0 (0.0%)                     | 175 (49.0%)                                  | 445 (88.3%)                                   | 169 (77.9%)                   | 789 (60.8%)             |                |
| IV                              | 0 (0.0%)                     | 0 (0.0%)                                     | 9 (1.8%)                                      | 48 (22.1%)                    | 57 (4.4%)               |                |
| 6MWD, m                         | 490.9 (74.8)                 | 382.3 (88.0)                                 | 279.2 (83.9)                                  | 145.0 (71.2)                  | 345.4 (128.7)           | 975 (69.0%)    |
| NT-proBNP, ng/L                 | 139 [68, 223]                | 372 [207, 711]                               | 1462 [757, 2620]                              | 3137 [1753, 5410]             | 839 [259, 2168]         | 1040 (73.6%)   |
| BNP, ng/L                       | 25 [18, 42]                  | 100 [58, 153]                                | 254 [124, 358]                                | 523 [350, 915]                | 149 [73, 330]           | 186 (13.2%)    |
| Comorbidities                   | 0.9 (1.0)                    | 1.7 (1.2)                                    | 1.9 (1.2)                                     | 2.1 (1.1)                     | 1.7 (1.2)               | 1127 (79.7%)   |
| Arterial hypertension           | 74 (36.1%)                   | 207 (61.4%)                                  | 333 (72.4%)                                   | 156 (72.6%)                   | 770 (63.3%)             | 1217 (86.1%)   |
| Coronary heart disease          | 18 (9.1%)                    | 73 (22.8%)                                   | 128 (28.4%)                                   | 68 (31.3%)                    | 287 (24.2%)             | 1185 (83.8%)   |
| Diabetes mellitus               | 26 (12.8%)                   | 91 (27.6%)                                   | 129 (27.9%)                                   | 66 (30.4%)                    | 312 (25.7%)             | 1212 (85.7%)   |
| BMI $\geq 30$ kg/m <sup>2</sup> | 57 (24.5%)                   | 152 (39.2%)                                  | 199 (38.4%)                                   | 68 (28.3%)                    | 476 (34.5%)             | 1379 (97.5%)   |

Categorical data are shown as n (%) of the respective population. Continuous data are depicted as mean (SD) or median [Q1-Q3]

Abbreviations: BMI, body mass index; PAH, pulmonary arterial hypertension; I/D/H-PAH, idiopathic, drug-associated or hereditary PAH; CTD, connective tissue disease; HIV, human immunodeficiency virus; PoPH, portopulmonary hypertension; CHD, congenital heart disease; WHO FC, World Health Organization Functional Class; 6MWD, 6-minute walking distance; BNP, brain natriuretic peptide; NT-proBNP, N-terminal fragment of pro-brain

natriuretic peptide; RAP, right atrial pressure; PAPm, mean pulmonary arterial pressure; PAWP, pulmonary arterial wedge pressure; CI, cardiac index; PVR, pulmonary vascular resistance; SvO<sub>2</sub>, mixed-venous oxygen saturation; DLCO, diffusion capacity of the lung for carbon monoxide; CCB, calcium channel blocker; ERA endothelin receptor antagonists; PDE5i, phosphodiesterase-5 inhibitors; sGCs, stimulator of soluble guanylate cyclase; PCA, prostacyclin analogues

**Table S2: PAH medications used at the time of the first follow-up visit**

|                                        | Low risk<br>n=240<br>(17.0%) | Intermediate<br>low risk<br>n=395<br>(27.9%) | Intermediate<br>high risk<br>n=534<br>(37.8%) | High risk<br>n=245<br>(17.3%) | All<br>n=1414<br>(100%) |
|----------------------------------------|------------------------------|----------------------------------------------|-----------------------------------------------|-------------------------------|-------------------------|
| Therapy (n=1,414)                      |                              |                                              |                                               |                               |                         |
| CCB                                    | 28 (11.7%)                   | 13 (3.3%)                                    | 16 (3.0%)                                     | 2 (0.8%)                      | 59 (4.2%)               |
| ERA                                    | 139 (57.9%)                  | 183 (46.3%)                                  | 239 (44.8%)                                   | 66 (26.9%)                    | 627 (44.3%)             |
| PDE5i/sGCs                             | 183 (76.2%)                  | 328 (83.0%)                                  | 425 (79.6%)                                   | 205 (83.7%)                   | 1141 (80.7%)            |
| PCA                                    | 10 (4.2%)                    | 20 (5.1%)                                    | 26 (4.9%)                                     | 14 (5.7%)                     | 70 (5.0%)               |
| Monotherapy                            | 122 (50.8%)                  | 249 (63.0%)                                  | 346 (64.8%)                                   | 189 (77.1%)                   | 906 (64.1%)             |
| Combination therapy                    | 114 (47.5%)                  | 139 (35.2%)                                  | 172 (32.2%)                                   | 45 (18.4%)                    | 470 (33.2%)             |
| Combination therapy<br>incl. IV/SC PCA | 2 (0.8%)                     | 7 (1.8%)                                     | 6 (1.1%)                                      | 3 (1.2%)                      | 18 (1.3%)               |

CCB, calcium channel blocker; ERA endothelin receptor antagonists; PDE5i, phosphodiesterase-5 inhibitors; sGCs, stimulator of soluble guanylate cyclase; IV, intravenous; SC, subcutaneous; PCA, prostacyclin analogues

**Table S3: Change in risk strata from baseline to follow-up by risk at baseline with the 3-strata model**

| <b>Risk</b>                     | <b>Low at follow-up</b> | <b>Intermediate at follow-up</b> | <b>High at follow-up</b> | <b>Sum</b> |
|---------------------------------|-------------------------|----------------------------------|--------------------------|------------|
| <b>Low at baseline</b>          | 97                      | 17                               | 0                        | 114        |
| <b>Intermediate at baseline</b> | 179                     | 782                              | 134                      | 1095       |
| <b>High at baseline</b>         | 6                       | 104                              | 95                       | 205        |
| <b>Sum</b>                      | 282                     | 903                              | 229                      | 1414       |

**Table S4: Change in risk strata from baseline to follow-up by risk at baseline with the 4-strata model**

| <b>Risk</b>                          | <b>Low at follow-up</b> | <b>Intermediate-low at follow-up</b> | <b>Intermediate-high at follow-up</b> | <b>High at follow-up</b> | <b>Sum</b> |
|--------------------------------------|-------------------------|--------------------------------------|---------------------------------------|--------------------------|------------|
| <b>Low at baseline</b>               | 63                      | 8                                    | 2                                     | 0                        | 73         |
| <b>Intermediate-low at baseline</b>  | 102                     | 171                                  | 65                                    | 8                        | 346        |
| <b>Intermediate-high at baseline</b> | 71                      | 198                                  | 387                                   | 139                      | 795        |
| <b>High at baseline</b>              | 4                       | 18                                   | 80                                    | 98                       | 200        |
| <b>Sum</b>                           | 240                     | 395                                  | 534                                   | 245                      | 1414       |

**Figure S1: Scatterplot of different NT-proBNP cut-off values and the corresponding p-values of the long-rank test for the 369 patients with an NT-proBNP value of 300-1100 ng/l**

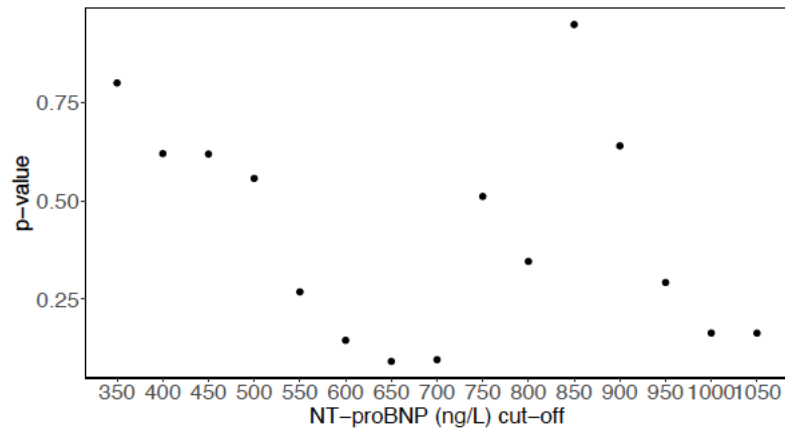

**Figure S2 Kaplan-Meier survival curves based on the 4 risk strata obtained at (a) baseline and (b) at first follow-up for the subgroup of patients with idiopathic, heritable and drug-associated PAH**

**(a)**

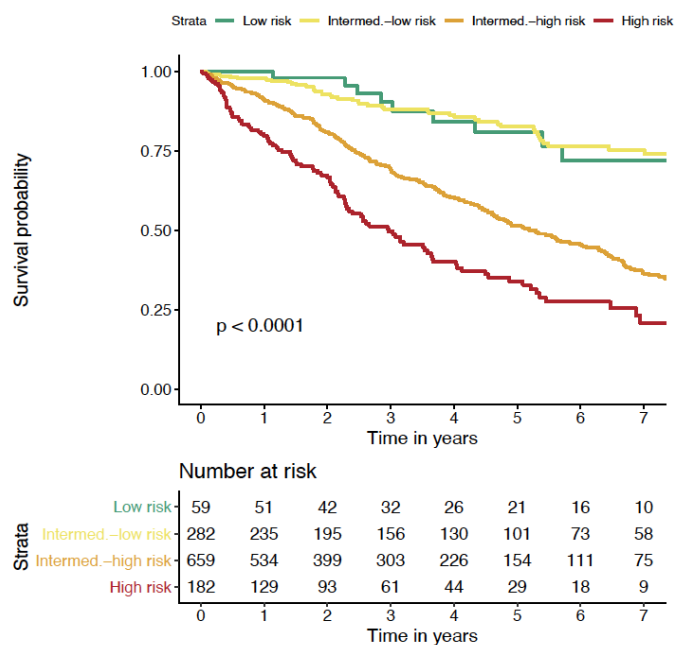

**(b)**

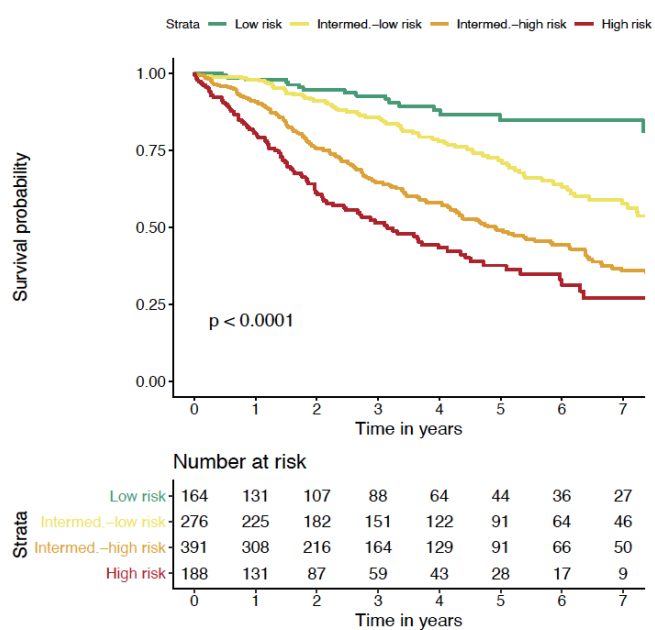

Figure S3 Kaplan-Meier survival curves based on the 4 risk strata obtained at baseline and at first follow-up for the subgroup of patients with connective tissue disease-associated PAH

(a)

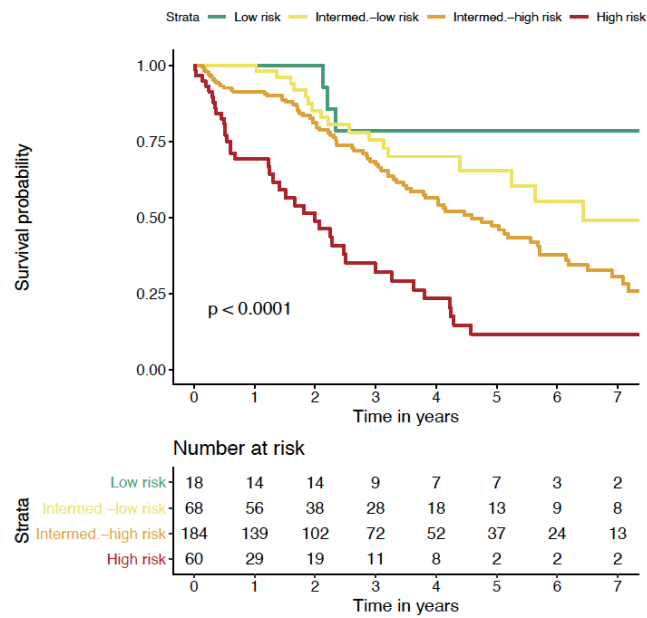

(b)

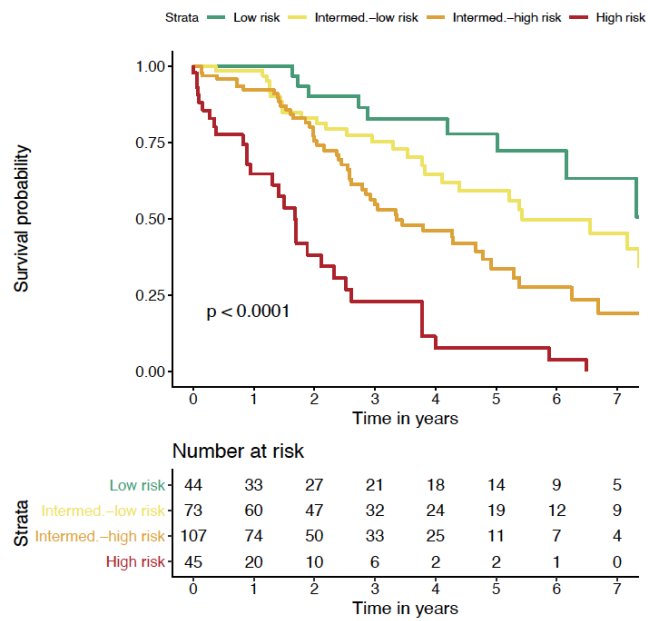

Supplement: inline-supplementary-material-1 [file inline-supplementary-material-1.pdf]
