# Supplementary material
Source: HighWire-hosted journal article supplement (https://erj.ersjournals.com/content/60/1/2102311)
Supplement: inline-supplementary-material-2 [file inline-supplementary-material-2.pdf]

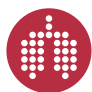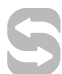

# COMPERA 2.0: a refined four-stratum risk assessment model for pulmonary arterial hypertension

Marius M. Hoeper<sup>1,2</sup>, Christine Pausch<sup>3</sup>, Karen M. Olsson<sup>1,2</sup>, Doerte Huscher<sup>4</sup>, David Pittrow<sup>1,2,5</sup>, Ekkehard Grünig<sup>6</sup>, Gerd Staehler<sup>7</sup>, Carmine Dario Vizza<sup>8</sup>, Henning Gall<sup>1,2,9</sup>, Oliver Distler<sup>10</sup>, Christian Opitz<sup>11</sup>, J. Simon R. Gibbs<sup>12</sup>, Marion Delcroix<sup>13</sup>, H. Ardeschir Ghofrani<sup>1,2,9,14</sup>, Da-Hee Park<sup>1</sup>, Ralf Ewert<sup>15</sup>, Harald Kaemmerer<sup>16</sup>, Hans-Joachim Kabitz<sup>17</sup>, Dirk Skowasch<sup>18</sup>, Juergen Behr<sup>19,20</sup>, Katrin Milger<sup>20</sup>, Michael Halank<sup>21</sup>, Heinrike Wilkens<sup>22</sup>, Hans-Jürgen Seyfarth<sup>23</sup>, Matthias Held<sup>24</sup>, Daniel Dumitrescu<sup>25</sup>, Iraklis Tsangaris<sup>26</sup>, Anton Vonk-Noordegraaf<sup>1,27</sup>, Silvia Ulrich<sup>1,28</sup>, Hans Klose<sup>29</sup>, Martin Claussen<sup>30</sup>, Tobias J. Lange<sup>31</sup> and Stephan Rosenkranz<sup>32</sup>

<sup>1</sup>Dept of Respiratory Medicine, Hannover Medical School, Hannover, Germany. <sup>2</sup>German Center of Lung Research (DZL), Germany. <sup>3</sup>GWT-TUD GmbH, Epidemiological Centre, Dresden, Germany. <sup>4</sup>Institute of Biometry and Clinical Epidemiology, Charité-Universitätsmedizin, Berlin, Germany. <sup>5</sup>Institute for Clinical Pharmacology, Medical Faculty, Technical University, Dresden, Germany. <sup>6</sup>Center for Pulmonary Hypertension, Thoraxklinik at Heidelberg University Hospital, Translational Lung Research Center Heidelberg (TLRC), German Center for Lung Research (DZL), Heidelberg, Germany. <sup>7</sup>Lungenklinik, Löwenstein, Germany. <sup>8</sup>Dipartimento di Scienze Cliniche Internistiche, Anestesiologiche e Cardiologiche, Sapienza, University of Rome, Rome, Italy. <sup>9</sup>Dept of Internal Medicine, Justus-Liebig-University Giessen, Universities of Giessen and Marburg Lung Center (UGMLC), Giessen, Germany. <sup>10</sup>Dept of Rheumatology, University Hospital, Zurich, Switzerland. <sup>11</sup>Dept of Cardiology, DRK Kliniken Berlin Westend, Berlin, Germany. <sup>12</sup>Dept of Cardiology, National Heart and Lung Institute, Imperial College London, London, UK. <sup>13</sup>Clinical Dept of Respiratory Diseases, University Hospitals of Leuven and Laboratory of Respiratory Diseases and Thoracic Surgery (BREATHE), Dept of Chronic Diseases and Metabolism (CHROMETA), KU Leuven – University of Leuven, Leuven, Belgium. <sup>14</sup>Dept of Medicine, Imperial College London, London, UK. <sup>15</sup>Clinic of Internal Medicine, Dept of Respiratory Medicine, Universitätsmedizin Greifswald, Greifswald, Germany. <sup>16</sup>Deutsches Herzzentrum München, Klinik für angeborene Herzfehler und Kinderkardiologie, TU München, Munich, Germany. <sup>17</sup>Gemeinnützige Krankenhausbetriebsgesellschaft Konstanz mbH, Medizinische Klinik II, Konstanz, Germany. <sup>18</sup>Universitätsklinikum Bonn, Medizinische Klinik und Poliklinik II, Innere Medizin – Kardiologie/Pneumologie, Bonn, Germany. <sup>19</sup>Comprehensive Pneumology Center, Lungenforschungssambulanz, Helmholtz Zentrum, München, Germany. <sup>20</sup>Dept of Medicine V, University Hospital, LMU Munich, Comprehensive Pneumology Center Munich (CPC-M), Member of the German Center for Lung Research (DZL), Munich, Germany. <sup>21</sup>Universitätsklinikum Carl Gustav Carus der Technischen Universität Dresden, Medizinische Klinik und Poliklinik I, Dresden, Germany. <sup>22</sup>Klinik für Innere Medizin V, Pneumologie, Universitätsklinikum Universitätsklinikum des Saarlandes, Homburg, Germany. <sup>23</sup>Universitätsklinikum Leipzig, Medizinische Klinik und Poliklinik II, Abteilung für Pneumologie, Leipzig, Germany. <sup>24</sup>Dept of Internal Medicine, Respiratory Medicine and Ventilatory Support, Medical Mission Hospital, Central Clinic Würzburg, Würzburg, Germany. <sup>25</sup>Clinic for General and Interventional Cardiology and Angiology, Herz- und Diabeteszentrum NRW, Ruhr-Universität Bochum, Bad Oeynhausen, Germany. <sup>26</sup>Attikon University Hospital, 2nd Critical Care Dept, National and Kapodistrian University of Athens, Athens, Greece. <sup>27</sup>Amsterdam UMC, Vrije Universiteit Amsterdam, Dept of Pulmonary Medicine, Amsterdam Cardiovascular Sciences, Amsterdam, The Netherlands. <sup>28</sup>Clinic of Pulmonology, University Hospital of Zurich, Zurich, Switzerland. <sup>29</sup>Dept of Respiratory Medicine, Eppendorf University Hospital, Hamburg, Germany. <sup>30</sup>LungenClinic Grosshansdorf, Fachabteilung Pneumologie, Großhansdorf, Germany. <sup>31</sup>Dept of Internal Medicine II, University Medical Center Regensburg, Regensburg, Germany. <sup>32</sup>Clinic III for Internal Medicine (Cardiology) and Center for Molecular Medicine (CMMC), and the Cologne Cardiovascular Research Center (CCRC), University of Cologne, Cologne, Germany.

Corresponding author: Marius M. Hoeper ([hoeper.marius@mh-hannover.de](mailto:hoeper.marius@mh-hannover.de))

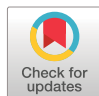

Shareable abstract (@ERSpublications)

**COMPERA 2.0, a four-stratum risk assessment model based on refined cut-off levels for functional class, 6MWD and BNP/NT-proBNP was more sensitive to prognostically significant changes in risk than the original three-stratum model** <https://bit.ly/3mzPKjA>

**Cite this article as:** Hoeper MM, Pausch C, Olsson KM, et al. COMPERA 2.0: a refined four-stratum risk assessment model for pulmonary arterial hypertension. *Eur Respir J* 2022; 60: 2102311 [DOI: 10.1183/13993003.02311-2021].

This single-page version can be shared freely online.

Copyright ©The authors 2022.

## Abstract

**Background** Risk stratification plays an essential role in the management of patients with pulmonary arterial hypertension (PAH). The current European guidelines propose a three-stratum model to categorise risk as low, intermediate or high, based on the expected 1-year mortality. However, with this model, most

This version is distributed under the terms of the Creative Commons Attribution Non-Commercial Licence 4.0. For commercial reproduction rights and permissions contact [permissions@ersnet.org](mailto:permissions@ersnet.org)

Received: 23 Aug 2021

Accepted: 29 Oct 2021

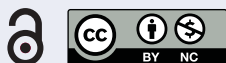

patients are categorised as intermediate risk. We investigated a modified approach based on four risk categories, with intermediate risk subdivided into intermediate-low and intermediate-high risk.

**Methods** We analysed data from the Comparative, Prospective Registry of Newly Initiated Therapies for Pulmonary Hypertension (COMPERRA), a European pulmonary hypertension registry, and calculated risk at diagnosis and first follow-up based on World Health Organization functional class, 6-min walk distance (6MWD) and serum levels of brain natriuretic peptide (BNP) or N-terminal pro-BNP (NT-proBNP), using refined cut-off values. Survival was assessed using Kaplan–Meier analyses, log-rank testing and Cox proportional hazards models.

**Results** Data from 1655 patients with PAH were analysed. Using the three-stratum model, most patients were classified as intermediate risk (76.0% at baseline and 63.9% at first follow-up). The refined four-stratum risk model yielded a more nuanced separation and predicted long-term survival, especially at follow-up assessment. Changes in risk from baseline to follow-up were observed in 31.1% of the patients with the three-stratum model and in 49.2% with the four-stratum model. These changes, including those between the intermediate-low and intermediate-high strata, were associated with changes in long-term mortality risk.

**Conclusions** Modified risk stratification using a four-stratum model based on refined cut-off levels for functional class, 6MWD and BNP/NT-proBNP was more sensitive to prognostically relevant changes in risk than the original three-stratum model.
